# Supplementary material
Source: publisher figshare collection journal article supplement (https://acs.figshare.com/ndownloader/files/4421506)
Supplement: Supplementary file 1 [file 4421506]

## SUPPORTING INFORMATION

### Electrochemical Behavior and Electrogenenerated Chemiluminescence of Star-Shaped D-A Compounds with a 1, 3, 5-triazine Core and Substituted Fluorene Arms

Khalid M. Omer, Sung-Yu Ku, Yu-Chen Chen, Ken-Tsung Wong, and Allen J Bard

*Center for Electrochemistry, Department of Chemistry and Biochemistry, University  
of Texas at Austin, Austin, TX 78712, USA*

*Department of Chemistry, National Taiwan University, 106 Taipei, Taiwan*

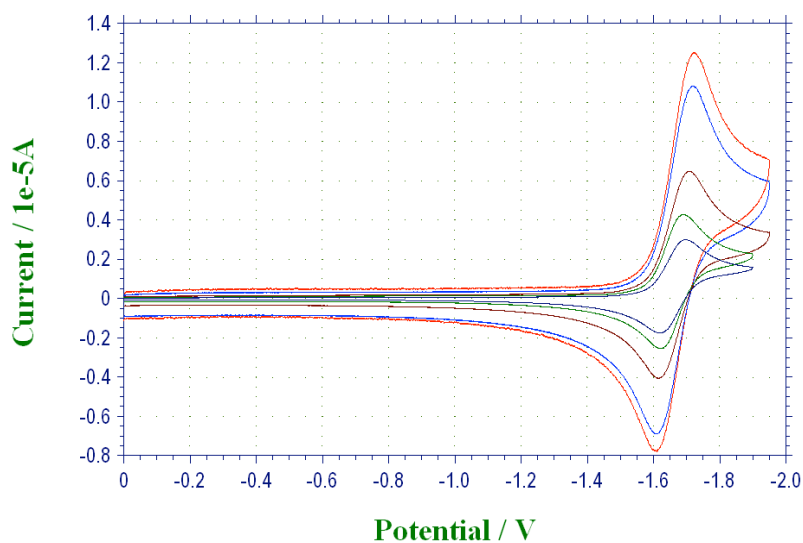

**Figure S1.** Cyclic voltammograms of **TAM1** for several scan rates (50, 100, 500, 750, 1000) mV/s.

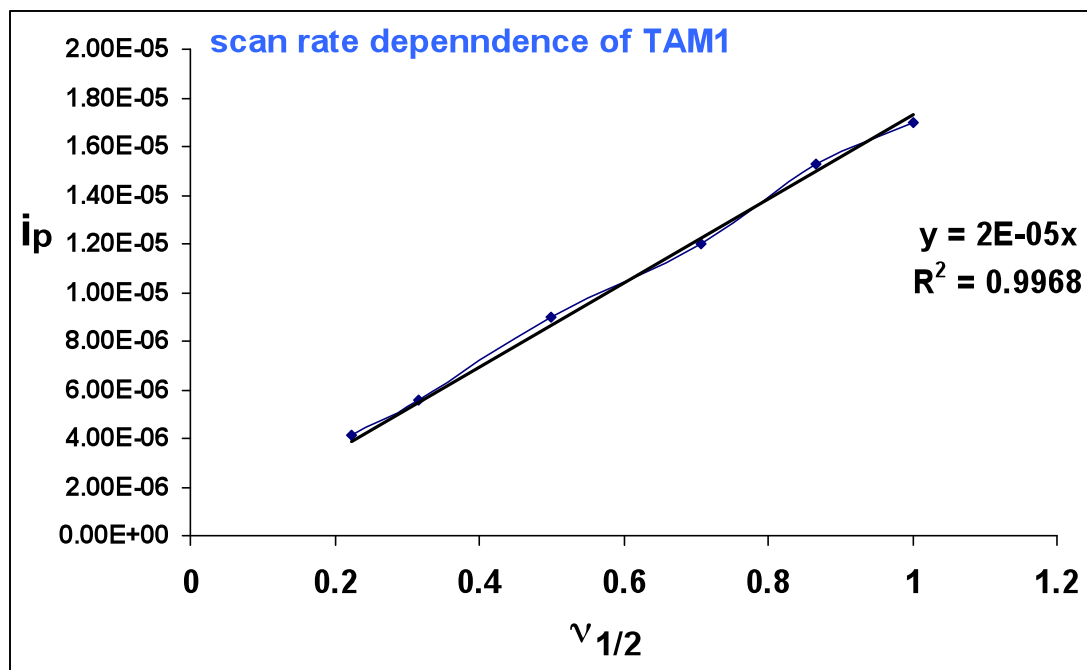

Figure S2. Scan rate dependence of TAM1.

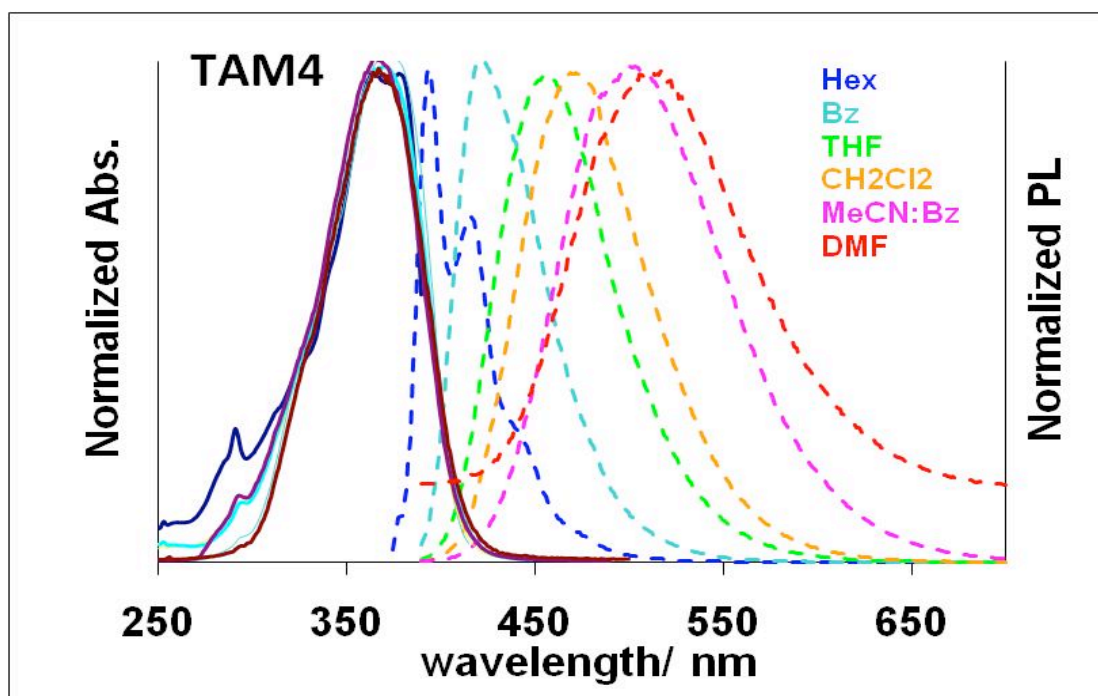

Figure S3. Absorption and emission spectra of TAM4 in different solvents,

Absorption (solid lines), emission (dashed lines).
